# Supplementary material
Source: PubMed Central journal article supplement (PMC2588422)

**SUPPORTING INFORMATION FOR****Synthesis of Antimicrobial Natural Products Targeting FtsZ: (±)-Dichamanetin and (±)-2''''-Hydroxy-5''-benzylisouvarinol-B**

Sameer Urgaonkar, Henry S. La Pierre, Israel Meir, Henrik Lund,<sup>†</sup> Debabrata Raychaudhuri,<sup>†</sup> and Jared T. Shaw<sup>\*</sup>

*Broad Institute of Harvard and MIT, Program in Chemical Biology, 320 Bent St, Cambridge, MA 02141 and <sup>†</sup>Department of Molecular Biology and Microbiology, Tufts University School of Medicine, 136 Harrison Avenue, Boston, MA 02111*

*shaw@broad.harvard.edu*

**TABLE OF CONTENTS**

| <b>Contents</b>                                        | <b>Page Numbers</b> |
|--------------------------------------------------------|---------------------|
| <b>1. General Methods</b>                              | S2-S2               |
| <b>2. Experimental Procedures</b>                      | S3-S11              |
| <b>3. GTPase Assay</b>                                 | S12-S12             |
| <b>4. References</b>                                   | S13-S13             |
| <b>5. <sup>1</sup>H and <sup>13</sup>C NMR Spectra</b> | S14-S31             |

**General Methods:**

$^1\text{H}$  NMR spectra were obtained on a Varian Unity Inova 500 spectrometer (500 MHz). Chemical shifts ( $\delta$ ) are reported in parts per million (ppm) relative to residual solvent ( $\text{CHCl}_3$ , s,  $\delta$  7.26 or  $\text{CH}_3\text{COCH}_3$ ,  $\delta$  2.05). Multiplicities are given as: s (singlet), d (doublet), t (triplet), dd (doublet of doublets), m (multiplet), br s (broad singlet). Proton-decoupled  $^{13}\text{C}$  NMR spectra were obtained on a Varian Unity Inova 500 spectrometer (125 MHz).  $^{13}\text{C}$  chemical shifts are reported relative to  $\text{CDCl}_3$  (t,  $\delta$  77.0) unless otherwise noted. IR frequencies are given in  $\text{cm}^{-1}$  and spectra were obtained on a Perkin-Elmer Model 2000 FT-IR spectrophotometer. Tandem high performance liquid chromatography/mass spectral (LCMS) analyses were performed on a Micromass Platform LCZ mass spectrometer or a Micromass Platform LCT mass spectrometer in atmospheric pressure chemical ionization (APCI) mode after separation performed on a Waters Alliance 2690 separations module. The actual separations were performed on a Waters Symmetry $^{\text{®}}$   $\text{C}_{18}$  3.5  $\mu\text{m}$ , 2.1 x 50 mm column with a flow rate of 0.4 mL/min and a 12 min gradient of 15-100%  $\text{CH}_3\text{CN}$  in  $\text{H}_2\text{O}$ , with a constant 0.1% formic acid buffer using a Waters 996 photodiode array detector.

Silica gel chromatographic purifications were performed by flash chromatography with silica gel (EMD, 40–63  $\mu\text{m}$ ) packed in glass columns; the eluting solvent for each purification was determined by thin layer chromatography (TLC). Analytical TLC was performed on glass plates coated with 0.25 mm silica gel and visualized by ultraviolet light or by staining with ceric ammonium molybdate stain followed by gentle heating.

Manipulations under an inert atmosphere were carried out using standard Schlenk line techniques. Tetrahydrofuran (THF), dichloromethane ( $\text{CH}_2\text{Cl}_2$ ), and toluene ( $\text{PhCH}_3$ ) were dried by passage through a column of activated alumina (as described in *Organometallics* **1996**, *15*, 1518–1520). Microwave reactions were performed using Emrys $^{\text{™}}$  Optimizer (Biotage, formerly Personal Chemistry) in a septa capped 0.5-2 mL Smith $^{\text{™}}$  process vial with stirring. Unless otherwise specified, all commercially available reagents were used as received.

**Experimental Procedures:**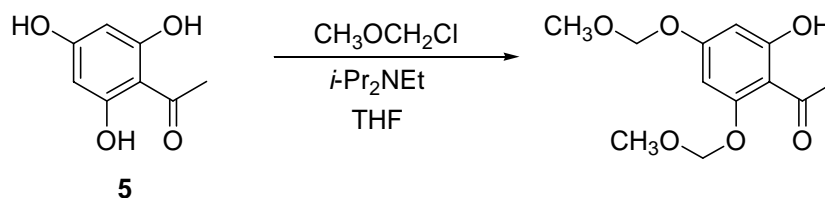

**2',4'-Bis(methoxymethoxy)-6'-hydroxyacetophenone<sup>1</sup>.** To a cooled (0 °C) solution of 2',4',6'-trihydroxyacetophenone monohydrate **5** (1.4 g, 7.5 mmol, 1.0 equiv) and *N,N*-diisopropylethylamine (13.1 mL, 75.0 mmol, 10.0 equiv) in 50 mL of dry THF was added dropwise chloromethylmethyl ether (1.3 mL, 16.5 mmol, 2.2 equiv) under an atmosphere of argon. The mixture was allowed to stir for 12 h after which it was quenched with 20 mL of water and extracted with EtOAc (3×25 mL). The combined organic layers were washed with 5% aqueous HCl, water, and brine, dried over anhydrous sodium sulfate, filtered and concentrated. The crude product was purified by flash column chromatography (0 to 15% EtOAc/hexanes) to yield the title compound as a white solid (1.4 g, 73%). The spectroscopic data (<sup>1</sup>H and <sup>13</sup>C NMR) were consistent with that reported in the literature.

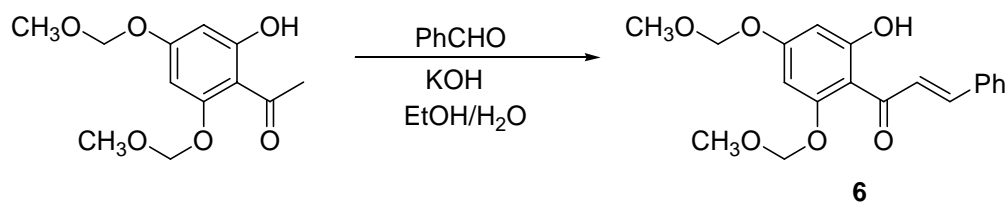

**2',4'-Bis(methoxymethoxy)-6'-hydroxychalcone<sup>2</sup> (6).** To a cooled (0 °C) solution of KOH (3.22 g, 57.6 mmol, 24.0 equiv) in EtOH-H<sub>2</sub>O (1:1 v/v, 10 mL) was added dropwise a cooled (0 °C) mixture of benzaldehyde (0.25 mL, 2.45 mmol, 1.02 equiv) and 2',4'-bis(methoxymethoxy)-6'-hydroxyacetophenone (0.614 g, 2.4 mmol, 1.0 equiv) in EtOH (5 mL). The reaction mixture was stirred at this temperature (0 °C) for 12 h and then for additional 36 h at rt. The mixture was then diluted with ether (20 mL) and the

organic layer was separated. The aqueous layer was further extracted with ether (3×25 mL). The combined organic extracts were washed with 5% aqueous HCl, water, and brine solution, dried over Na<sub>2</sub>SO<sub>4</sub>, filtered, and concentrated. The crude product was purified by flash column chromatography (0 to 20% EtOAc/hexanes) to yield **6** (0.700 g, 85%) as an orange solid. The spectroscopic data (<sup>1</sup>H and <sup>13</sup>C NMR) were consistent with that reported in the literature.

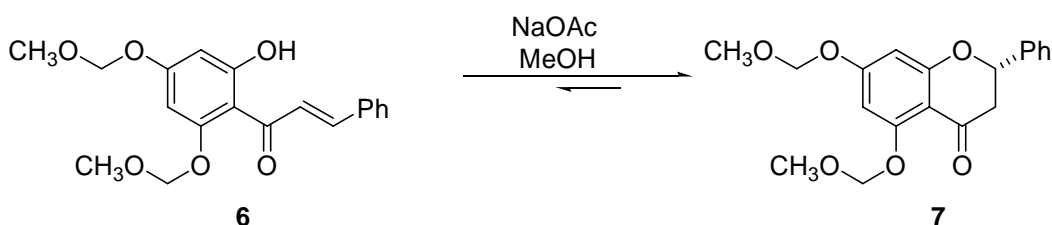

**(±)-2',4'-Bis(methoxymethoxy)flavanone (7)**. A solution of **6** (0.7 g, 2.0 mmol, 1.0 equiv) and anhydrous sodium acetate (2.25 g, 27.4 mmol, 13.7 equiv) in 400 mL of MeOH was refluxed under an atmosphere of argon for 48 h. After cooling, the solvent was removed in *vacuo* and H<sub>2</sub>O (40 mL) was added to the resulting residue. The aqueous phase was extracted with EtOAc (4×50 mL). The combined organic layers were dried over anhydrous sodium sulfate, filtered, and concentrated. The crude product was purified by flash column chromatography (0 to 30% EtOAc/hexanes) to yield **7** (0.502 g, 72%) as a off-white solid (*R*<sub>F</sub> 0.20 in 30% EtOAc in Hexanes) plus unreacted starting material **5** (0.198 g, 28%): <sup>1</sup>H NMR (500 MHz, CDCl<sub>3</sub>) δ 7.44-7.37 (m, 5H), 6.44 (d, *J* = 11.1 Hz, 2H), 5.43 (d, *J* = 8.1 Hz, 1H), 5.27 (s, 2H), 5.17 (s, 2H), 3.53 (s, 3H), 3.47 (s, 3H), 3.04 (apparently dd, 1H), 2.81 (d, *J* = 10.2 Hz, 1H); <sup>13</sup>C NMR (125 MHz, CDCl<sub>3</sub>) δ 189.0, 164.4, 163.2, 159.5, 138.7, 128.7, 128.6, 126.0, 107.3, 98.1, 97.4, 95.0, 94.0, 79.0, 56.5, 56.4, 45.8; IR (CDCl<sub>3</sub>) 2958, 2905, 2828, 1680, 1573, 1436, 1148 cm<sup>-1</sup>; MS (ESI-neg.) *m/z* calcd for C<sub>19</sub>H<sub>20</sub>O<sub>6</sub> (M + Na)<sup>+</sup> 367.12, found 367.88.

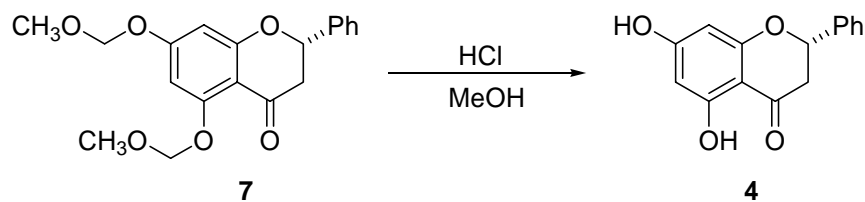

(±)-**Pinocembrin**<sup>3</sup> (**4**). A solution of **7** (0.42 g, 1.2 mmol, 1.0 equiv) and 6N HCl (2.2 mL, 13.2 mmol, 11.0 equiv) in MeOH (10 mL) was refluxed for 30 min. After cooling, the solvent was removed *in vacuo* and the resulting residue was directly subjected to flash column chromatography (0 to 20% EtOAc/hexanes) to yield **4** (0.282 g, 90%) as a white solid. The spectroscopic data (<sup>1</sup>H and <sup>13</sup>C NMR) were consistent with that reported in the literature.

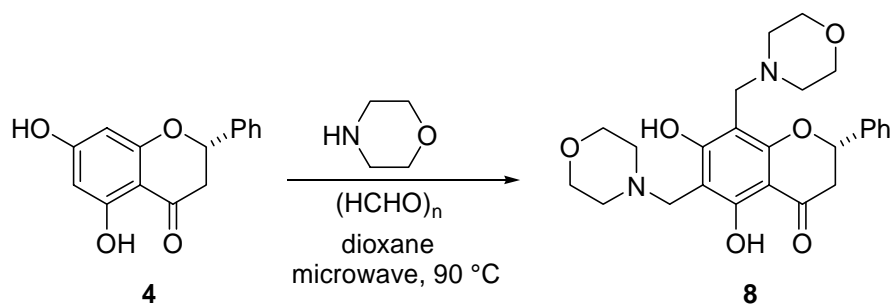

**5,7-Dihydroxy-6,8-di((1-morpholino)-methyl)-flavanone (8)**. Pinocembrin **4** (70 mg, 0.27 mmol, 1.0 equiv), paraformaldehyde (33 mg, 1.09 mmol, 4.0 equiv), morpholine (58  $\mu$ L, 0.65 mmol, 2.4 equiv), and anhydrous dioxane (2 mL) were mixed in a Smith<sup>TM</sup> process vial and sealed. The reaction mixture was heated in a microwave reactor at 90 °C for 10 minutes. After cooling to ambient temperature, the solvent was evaporated *in vacuo*. The crude product was subjected to flash column chromatography (EtOAc and then 20% MeOH/EtOAc) to yield **8** (90 mg, 73%) as a yellow oil: <sup>1</sup>H NMR (500 MHz, CDCl<sub>3</sub>)  $\delta$  7.43-7.36 (m, 5H), 5.40 (dd,  $J = 3.5, 9.5$  Hz, 1H), 3.75 (m, 13H), 3.05 (dd,  $J = 13.0, 4.5$  Hz, 1H), 2.84 (dd,  $J = 3.0, 14.0$  Hz, 1H), 2.61-2.56 (two s, 8H); <sup>13</sup>C NMR (125 MHz, CDCl<sub>3</sub>)  $\delta$  195.5, 167.4, 161.5, 159.8, 138.6, 128.8, 128.6, 125.8, 101.6, 101.5, 101.0, 78.8, 66.6, 66.5, 52.8, 51.4, 51.3, 43.2; IR (CDCl<sub>3</sub>) 3418, 2959, 1634, 1544 cm<sup>-1</sup>; MS (ESI)  $m/z$  calcd for C<sub>25</sub>H<sub>30</sub>N<sub>2</sub>O<sub>6</sub> (M + H)<sup>+</sup> 455.22, found 455.03.

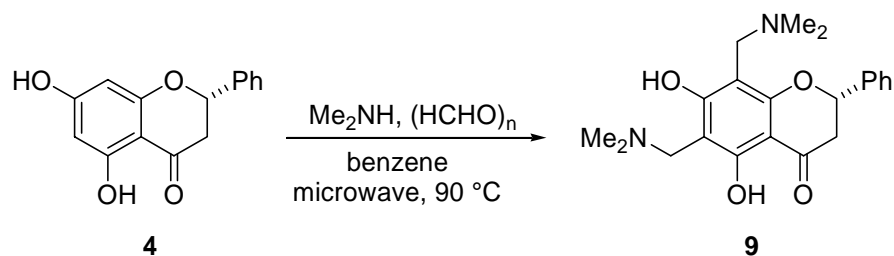

**5,7-Dihydroxy-6,8-di((dimethylamino)-methyl)-flavanone (9).** Pinocembrin **4** (14.5 mg, 0.057 mmol, 1.0 equiv), paraformaldehyde (4.1 mg, 0.136 mmol, 2.4 equiv), dimethylamine (2M in THF) (0.07 mL, 0.136 mmol, 2.4 equiv), and reagent grade benzene (2 mL) were mixed in a Smith<sup>TM</sup> process vial and sealed. The reaction mixture was heated in a microwave reactor at 90 °C for 10 minutes. After cooling to ambient temperature, the mixture was diluted with water (3 mL) and extracted with CH<sub>2</sub>Cl<sub>2</sub> (3×10 mL). The organic layers were combined, washed with the brine solution (5 mL), dried over Na<sub>2</sub>SO<sub>4</sub>, and concentrated. The purification of this compound using silica gel column chromatography proved to be difficult due to high polarity. The LC-MS analysis and the crude <sup>1</sup>H NMR confirmed the presence of **9** and thus reactions with **9** were performed without further purification.

**2,4,6-Trihydroxy-3,5-di(2'-hydroxybenzyl)-acetophenone (11).**

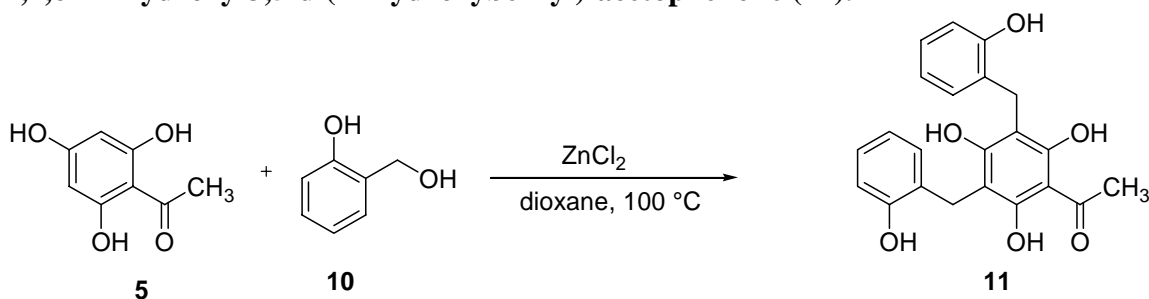

A solution of 2,4,6-trihydroxyacetophenone monohydrate **5** (200 mg, 1.07 mmol, 1.0 equiv), 2-hydroxybenzyl alcohol **10** (266 mg, 2.14 mmol, 2.0 equiv), and anhydrous ZnCl<sub>2</sub> (176 mg, 1.28 mmol, 1.2 equiv) in anhydrous dioxane (2 mL) was heated at 100 °C for 24 h under an atmosphere of argon. After cooling, the solvent was removed in *vacuo* and the crude product was purified by flash column chromatography (0 to 30% EtOAc/Hexanes) to afford **11** as a light yellow solid which on recrystallization with

acetone/hexanes provided **11** as an off-white solid (200 mg, 49%),  $R_F$  0.23 (30% EtOAc in Hexanes):  $^1\text{H}$  NMR (500 MHz,  $\text{CD}_3\text{COCD}_3$ )  $\delta$  11.79 (br s, 1H), 9.72 (br s, 3H), 7.48 (d,  $J = 7.5$  Hz, 2H), 7.07 (t,  $J = 7.5$  Hz, 2H), 6.94 (d,  $J = 8.0$  Hz, 2H), 6.84 (t,  $J = 7.5$  Hz, 2H), 3.94 (s, 4H), 2.66 (s, 3H);  $^{13}\text{C}$  NMR (125 MHz,  $\text{CD}_3\text{COCD}_3$ )  $\delta$  205.5, 162.0, 161.6, 154.5, 133.1, 129.2, 129.1, 122.6, 116.6, 108.5, 107.2, 34.1, 24.0; IR (acetone) 3254, 1698, 1458, 1367, 1301, 1239, 1108,  $755\text{ cm}^{-1}$ ; MS (ESI-neg.)  $m/z$  calcd for  $\text{C}_{22}\text{H}_{20}\text{O}_6$  ( $\text{M} - \text{H}$ ) $^-$  379.12, found 379.03.

**Procedure for microwave reactions:** A solution of 2,4,6-trihydroxyacetophenone monohydrate **5** (200 mg, 1.07 mmol, 1.0 equiv), 2-hydroxybenzyl alcohol **10** (266 mg, 2.14 mmol, 2.0 equiv), and anhydrous  $\text{ZnCl}_2$  (176 mg, 1.28 mmol, 1.2 equiv) in anhydrous dioxane (2 mL) were mixed in a Smith<sup>TM</sup> process vial and sealed. The reaction mixture was heated in a microwave reactor at  $130\text{ }^\circ\text{C}$  for 1 h. The solvent was removed in *vacuo* and the crude product was purified by flash column chromatography (0 to 30% EtOAc/Hexanes) to afford **11** as a light yellow solid which on recrystallization with acetone/hexanes provided **11** as an off-white solid (200 mg, 49%).

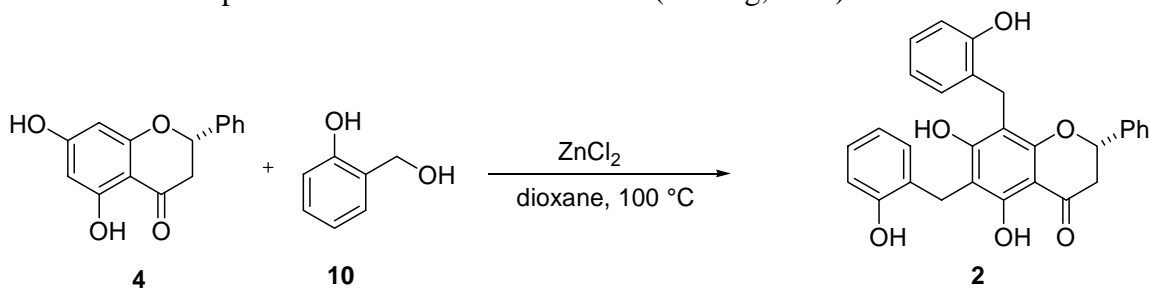

(±)-**Dichamanetin**<sup>4</sup> (**2**). A solution of **4** (60 mg, 0.23 mmol, 1.0 equiv), 2-hydroxybenzyl alcohol **10** (61 mg, 0.48 mmol, 2.1 equiv), and anhydrous  $\text{ZnCl}_2$  (67 mg, 0.48 mmol, 2.1 equiv) in anhydrous dioxane (2 mL) was heated at  $100\text{ }^\circ\text{C}$  for 24 h under an atmosphere of argon. After cooling, the solvent was removed in *vacuo* and the crude product was purified by flash column chromatography (0 to 30% EtOAc/Hexanes) to afford **2** (65 mg, 59%) as a light yellow solid,  $R_F$  0.32 (30% EtOAc in Hexanes):  $^1\text{H}$  NMR (500 MHz,  $\text{CD}_3\text{COCD}_3$ )  $\delta$  12.73 (s, 1H), 9.15 (br s, 2H), 7.59 (d,  $J = 7.5$  Hz, 2H), 7.46-7.38 (m, 3H),

7.23-7.22 (m, 1H), 7.09-7.07 (m, 1H), 7.04-6.99 (m, 2H), 6.86 (t,  $J = 7.5$  Hz, 2H), 6.77-6.69 (m, 2H), 5.64 (dd,  $J = 2.5, 10.0$  Hz, 2H), 3.92-3.91 (two s, 4H), 3.23 (dd,  $J = 13.0, 4.0$  Hz, 1H), 2.90 (dd,  $J = 3.0, 14.0$  Hz, 1H);  $^{13}\text{C}$  NMR (125 MHz,  $\text{CD}_3\text{COCD}_3$ )  $\delta$  198.7, 163.6, 161.7, 160.6, 155.6, 141.2, 132.3, 132.1, 130.6, 130.5, 130.4, 129.03, 128.99, 128.7, 128.67, 128.3, 122.1, 122.0, 116.9, 116.8, 109.6, 108.7, 104.5, 81.0, 44.6, 24.4, 23.7; IR ( $\text{CDCl}_3$ ) 3427, 1631, 1489, 1457  $\text{cm}^{-1}$ ; MS (ESI)  $m/z$  calcd for  $\text{C}_{29}\text{H}_{24}\text{O}_6$  ( $\text{M} + \text{H}$ )<sup>+</sup> 469.17, found 469.98.

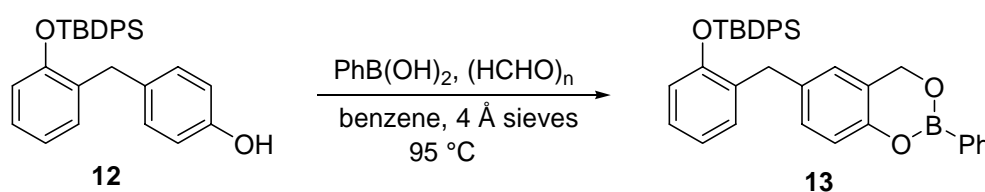

**1-*tert*-Butyldiphenylsilyloxy-2'-hydroxymethyl-2,4'-methylene diphenol (13).** A solution of **12** (416 mg, 0.95 mmol, 1.0 equiv), phenylboronic acid (307 mg, 1.05 mmol, 1.1 equiv), paraformaldehyde (286 mg, 9.5 mmol, 10.0 equiv), and propanoic acid (0.04 mL, 0.95 mmol, 1.0 equiv) in anhydrous benzene (10 mL) was refluxed in the presence of 4 Å molecular sieves for 24 h under an atmosphere of argon. Additional paraformaldehyde (60 mg) was added at intervals of 2 h. After cooling, the mixture was concentrated and 5 mL of  $\text{H}_2\text{O}$  was added. Extraction with ether ( $5 \times 10$  mL), washing with aqueous  $\text{Na}_2\text{CO}_3$  and water, and evaporation of the solvent afforded a residue which was purified by flash column chromatography (0 to 10% EtOAc/Hexanes) to afford the dioxaborin **13** (411 mg, 78%) as a white solid,  $R_F$  0.62 (30% EtOAc in Hexanes):  $^1\text{H}$  NMR (500 MHz,  $\text{CDCl}_3$ )  $\delta$  7.98 (d,  $J = 7.0$  Hz, 2H), 7.69 (d,  $J = 7.0$  Hz, 4H), 7.51-7.35 (m, 9H), 7.12-7.02 (m, 3H), 6.85-6.81 (m, 3H), 6.49-6.47 (m, 1H), 5.17 (s, 2H), 4.14 (s, 2H), 1.02 (s, 9H);  $^{13}\text{C}$  NMR (125 MHz,  $\text{CDCl}_3$ )  $\delta$  153.5, 147.5, 136.1, 135.6, 134.5, 132.9, 131.6, 131.0, 130.9, 130.2, 129.3, 128.0, 127.9, 127.3, 125.1, 122.5, 121.2, 119.2, 118.0, 116.7, 63.2, 35.9, 26.7, 19.7; IR ( $\text{CDCl}_3$ ) 3053, 3072, 2957, 2931, 2858, 1600, 1492, 1326, 1256  $\text{cm}^{-1}$ ; MS (ESI)  $m/z$  calcd for  $\text{C}_{36}\text{H}_{35}\text{BO}_3\text{Si}$  554.24, found 554.98.



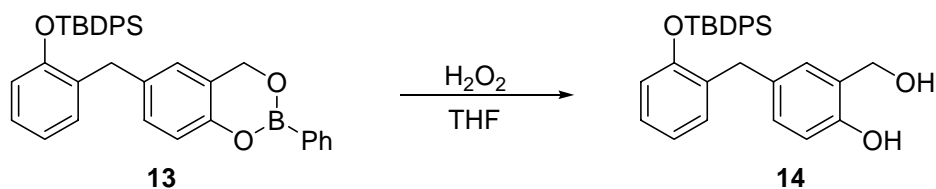

To a cooled (0 °C) solution of dioxaborin **13** (225 mg,) in dry THF (2 mL) was added 30% H<sub>2</sub>O<sub>2</sub> solution (1 mL) dropwise. The reaction mixture was allowed to warm to rt in 4 h after which cold H<sub>2</sub>O (2 mL) was added. The mixture was extracted with ether (10×10 mL). The combined extracts were washed with aqueous NaHSO<sub>3</sub>, dried over anhydrous Na<sub>2</sub>SO<sub>4</sub>, and concentrated to give a residue which was purified by flash column chromatography (0 to 30% EtOAc/Hexanes) to afford **14** (188 mg, 99%) as a colorless viscous oil, *R<sub>F</sub>* 0.41 (30% EtOAc in Hexanes): <sup>1</sup>H NMR (500 MHz, CDCl<sub>3</sub>) δ 7.72 (d, *J* = 8.0 Hz, 4H), 7.44-7.36 (m, 7H), 7.19 (br s, 1H), 7.12 (d, *J* = 8.5 Hz, 1H), 7.06-7.04 (m, 1H), 6.92 (br s, 1H), 6.86-6.80 (m, 3H), 6.50-6.48 (m, 1H), 4.79 (s, 2H), 4.12 (s, 2H), 1.06 (s, 9H); <sup>13</sup>C NMR (125 MHz, CDCl<sub>3</sub>) δ 154.1, 153.2, 135.4, 132.7, 132.5, 131.1, 130.6, 129.9, 129.8, 128.2, 127.8, 126.9, 124.5, 120.9, 118.9, 116.4, 64.6, 35.3, 26.5, 19.4; IR (CDCl<sub>3</sub>) 3403, 3071, 2931, 2857, 1490, 1254 cm<sup>-1</sup>; MS (ESI) *m/z* calcd for C<sub>30</sub>H<sub>32</sub>O<sub>3</sub>Si (M + Na)<sup>+</sup> 491.20, found 491.00.

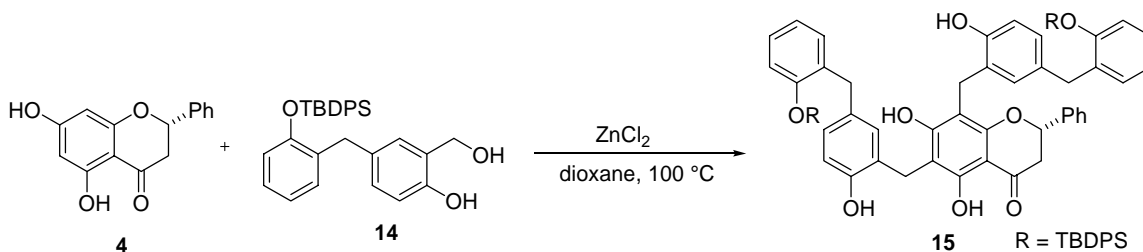

**(±)-2''',2''''-Bis(*tert*-butyldiphenylsilyloxy)-5''-benzylisouvarinol-B (15)**. A solution of **4** (90 mg, 0.35 mmol, 1.0 equiv), **14** (378 mg, 0.81 mmol, 2.3 equiv), and anhydrous ZnCl<sub>2</sub> (96 mg, 0.70 mmol, 2.0 equiv) in anhydrous dioxane (3 mL) was heated at 100 °C for 22 h under an atmosphere of argon. After cooling, the solvent was removed in *vacuo* and the crude product was purified by flash column chromatography (0 to 30% EtOAc/Hexanes) to afford **15** (374 mg, 92%) as a white solid, *R<sub>F</sub>* 0.3 (30% EtOAc in

Hexanes):  $^1\text{H}$  NMR (500 MHz,  $\text{CDCl}_3$ )  $\delta$  12.63 (s, 1H), 9.97 (br s, 1H), 8.02 (br s, 1H), 7.78-7.74 (m, 8H), 7.47-7.33 (m, 19H), 7.09-7.08 (m, 1H), 6.96-6.73 (m, 9H), 6.53-6.62 (m, 2H), 5.42 (d,  $J = 7.8$  Hz, 1H), 4.17 (s, 2H), 4.04 (s, 2H), 3.98 (s, 2H), 3.91 (s, 2H), 3.14-3.07 (m, 1H), 2.84 (d,  $J = 9.9$  Hz, 1H), 1.07 (s, 9H), 1.06 (s, 9H);  $^{13}\text{C}$  NMR (125 MHz,  $\text{CDCl}_3$ )  $\delta$  196.4, 160.1, 159.5, 158.4, 153.2, 150.5, 150.3, 138.4, 135.4, 135.3, 133.7, 133.2, 132.7, 132.6, 132.5, 131.4, 131.3, 130.8, 130.3, 129.9, 129.8, 128.9, 128.3, 128.1, 127.7, 126.7, 126.6, 126.4, 126.2, 120.81, 120.78, 118.7, 118.6, 115.6, 115.5, 108.6, 107.3, 103.1, 79.5, 43.4, 35.4, 35.3, 26.45, 26.40, 23.3, 22.5, 19.4, 19.3; IR ( $\text{CDCl}_3$ ) 3249, 3071, 2931, 2857, 1631, 1490, 1452, 1254, 1112, 909  $\text{cm}^{-1}$ ; MS (ESI-neg.)  $m/z$  calcd for  $\text{C}_{75}\text{H}_{72}\text{O}_8\text{Si}_2$  ( $\text{M} - \text{H}$ ) $^-$  1155.47, found 1155.56.

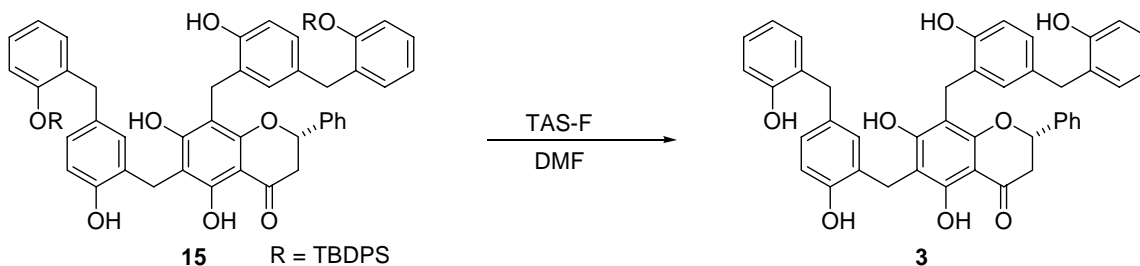

( $\pm$ )-2''''-Hydroxy-5''-benzylisouvarinol-B<sup>5</sup> (**3**). To a solution of **15** (65 mg, 0.056 mmol, 1.0 equiv) in anhydrous DMF (3 mL) at rt was added TAS-F (78 mg, 0.28 mmol, 5.0 equiv) under an atmosphere of argon. The reaction was stirred for 24 h at rt. The reaction mixture was diluted with EtOAc (15 mL) and washed with  $\text{NaHCO}_3$  (5 mL), saturated LiCl (5 $\times$ 2 mL) and brine (5 mL) solution. The crude product was purified by flash column chromatography (0 to 50% EtOAc/Hexanes) to afford **3** as a light yellow solid which on recrystallization with  $\text{CHCl}_3$ /hexanes afforded a white solid (24.4 mg, 64%),  $R_F$  0.42 (50% EtOAc in Hexanes):  $^1\text{H}$  NMR (500 MHz,  $\text{CDCl}_3$ )  $\delta$  12.77 (s, 1H), 9.36 (br s, 1H), 7.44-7.42 (m, 6H), 7.19-7.07 (m, 4H), 6.95-6.89 (m, 3H), 6.83-6.80 (m, 3H), 6.73 (d,  $J = 8.0$  Hz, 2H), 6.64 (d,  $J = 8.0$  Hz, 1H), 5.33 (dd,  $J = 2.5, 11.0$  Hz, 2H), 5.06 (br s, 1H), 4.74 (br s, 1H), 3.91 (s, 2H), 3.81 (s, 2H), 3.74-3.72 (two s, 4H), 3.03 (dd,

$J = 13.5, 3.5$  Hz, 1H), 2.75 (dd,  $J = 2.5, 14.5$  Hz, 1H);  $^{13}\text{C}$  NMR (125 MHz,  $\text{CDCl}_3$ )  $\delta$  196.7, 161.5, 158.8, 158.6, 153.9, 153.8, 152.6, 150.9, 138.6, 132.6, 132.5, 132.2, 131.3, 130.9, 129.3, 129.2, 128.4, 128.3, 128.2, 128.0, 127.62, 127.59, 126.7, 126.6, 126.5, 121.6, 121.2, 116.9, 116.4, 115.9, 108.6, 107.7, 103.0, 79.9, 43.6, 36.6, 35.8, 23.8, 23.3; IR ( $\text{CDCl}_3$ ) 3396, 2925, 1631, 1455, 908, 734  $\text{cm}^{-1}$ ; MS (ESI-neg.)  $m/z$  calcd for  $\text{C}_{43}\text{H}_{36}\text{O}_8$  ( $\text{M} - \text{H}$ ) $^-$  679.23, found 679.12.

### $^1\text{H}$ NMR Comparison

| Natural (2'''-Hydroxy-5''-benzylisouvarinol-B), $^1\text{H}$ NMR, $\text{CDCl}_3$ , 300 MHz | Synthetic (2'''-Hydroxy-5''-benzylisouvarinol-B), $^1\text{H}$ NMR, $\text{CDCl}_3$ , 500 MHz          |
|---------------------------------------------------------------------------------------------|--------------------------------------------------------------------------------------------------------|
| Not reported                                                                                | 12.77 (1H, s)                                                                                          |
| Not reported                                                                                | 9.36 (1H, br s)                                                                                        |
| 6.63-7.8 (19H, m)                                                                           | 7.44-7.42 (6H, m), 7.19-7.07 (4H, m), 6.95-6.89 (3H, m), 6.83-6.80 (3H, m), 6.73 (2H, d), 6.64 (1H, d) |
| 5.73 (1H, dd)                                                                               | 5.33 (1H, dd)                                                                                          |
| Not reported                                                                                | 5.06 (1H, br s)                                                                                        |
| Not reported                                                                                | 4.74 (1H, br s)                                                                                        |
| 4.00, 3.97, 3.87, 3.80 (8H, 4s)                                                             | 3.91, 3.81, 3.74, 3.72 (8H, 4s)                                                                        |
| 3.04 (1H, dd)                                                                               | 3.03 (1H, dd)                                                                                          |
| 2.74 (1H, dd)                                                                               | 2.75 (1H, dd)                                                                                          |

**GTPase Assay:**

Untagged *E. coli* FtsZ was expressed from pET-3Z<sup>+</sup> in BL21(λDE3) cells (RayChaudhuri, D.; Park, J. T. *Nature* **1992**, 359, 251-254) and purified using a two-step ammonium sulfate fractionation (Romberg, L.; Simon, M.; Erickson, H. P. *J. Biol. Chem.* **2001**, 276, 11743-11753). FtsZ GTPase assay was performed essentially as described by Margalit *et al.* (Margalit, D. N.; Romberg, L.; Mets, R. B.; Hebert, A. M.; Mitchison, T. J.; Kirschner, M. W.; RayChaudhuri, D. *Proc. Natl. Acad. Sci. U.S.A.* **2004**, 101, 11821-11826). Briefly, 2 μM *E. coli* FtsZ in polymerization buffer (4-morpholinepropanesulfonic acid, pH 6.5, 50 mM KCl, 5 mM MgCl<sub>2</sub>) was preincubated with or without varying concentrations of test compounds (in dimethyl sulfoxide, DMSO) such that the DMSO concentrations in the samples were ~2%. The control tubes received 2% DMSO alone. After a 5-min preincubation at 25 °C, the reactions were initiated by adding 0.5 mM GTP. Aliquots were withdrawn after 5, 15 and 25 minute intervals and quenched with 50 mM EDTA before color development with the malachite green solution [2 volumes malachite green (0.8 mg/ml)/1 volume polyvinyl alcohol (23.2 mg/ml)/1 volume ammonium molybdate (57.2 mg/ml in 2H<sub>2</sub>O:3HCl)/ 2 volumes H<sub>2</sub>O]. IC<sub>50</sub> values were determined from the relative slopes of GTP hydrolysis at different inhibitor concentrations compared to the control with DMSO only.

| <b>Compound</b>                                                    | <b>IC<sub>50</sub> (μM)</b> |
|--------------------------------------------------------------------|-----------------------------|
| <b>(±)-Dichamanetin (2)</b>                                        | 12.5 ± 0.5                  |
| <b>(±)-2'''-Hydroxy-5''-benzylisouvarinol-B (3)</b>                | 8.3 ± 0.5                   |
| <b>2,4,6-Trihydroxy-3,5-di(2'-hydroxybenzyl)-acetophenone (11)</b> | 60.4 ± 2.2                  |

**References**

1. Choi, Y-J.; Shim, P-J.; Ko, B-S.; Kim, H-D. *Heterocycles* **1996**, *43*, 1223-1228.
2. Litkei, G.; Gulácsi, K.; Antus, S.; Blaskó, G. *Liebigs Ann.* **1995**, 1711-1715.
3. Bick, I. R. C.; Brown, R. B.; Hillis, W. E. *Aust. J. Chem.* **1971**, *25*, 449-451.
4. Lasswell, W. L., Jr.; Hufford, C. D. *J. Org. Chem.* **1977**, *42*, 1295-1302.
5. Anam, E. M. *Indian J. Chem.* **1999**, *33B*, 1009-1011.

## NMR SPECTRA

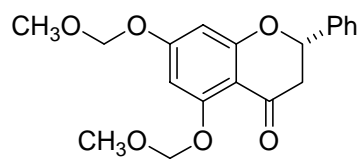

7

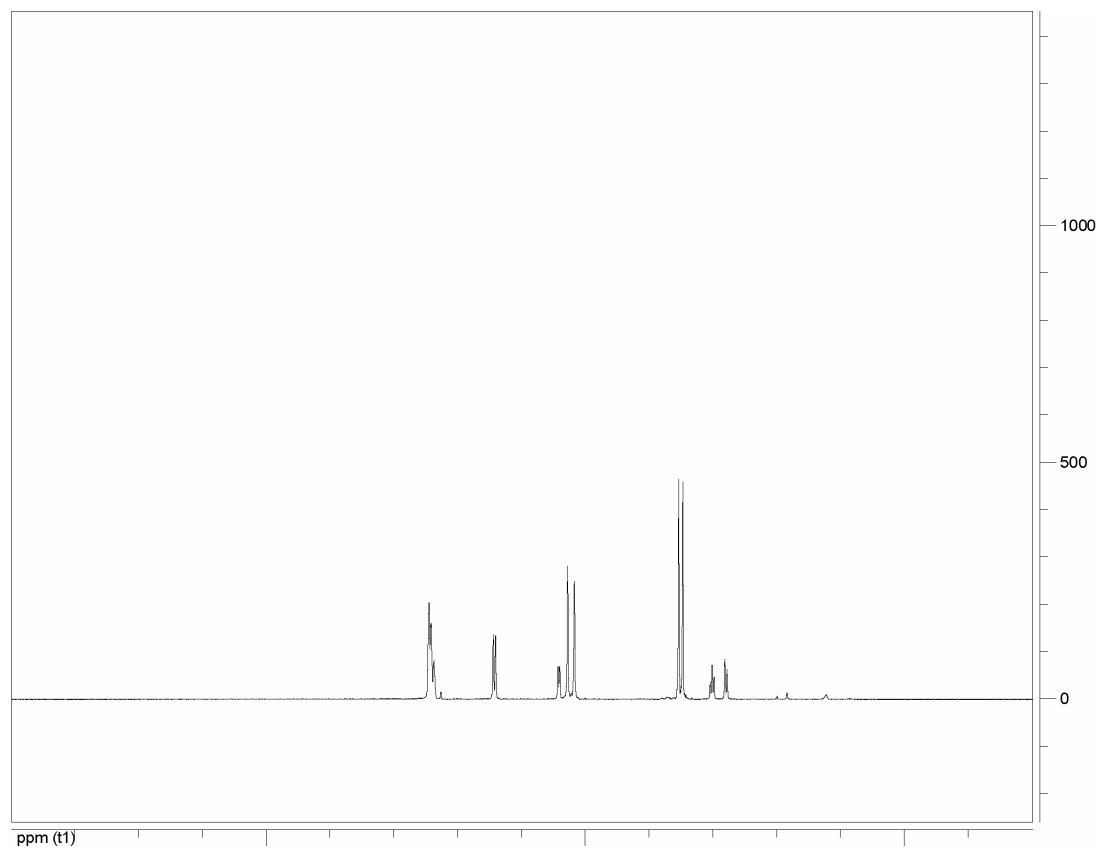

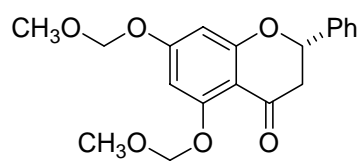

7

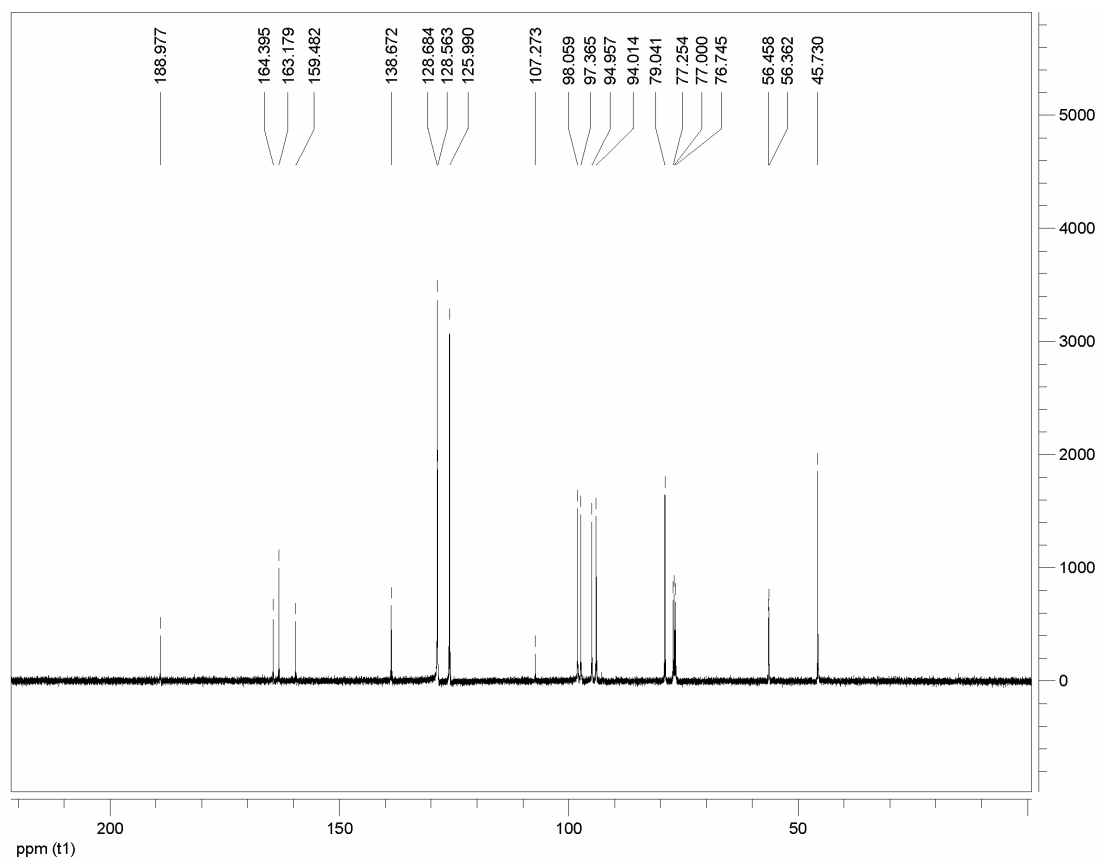

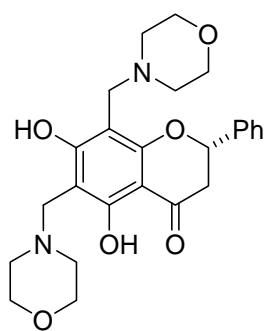**8**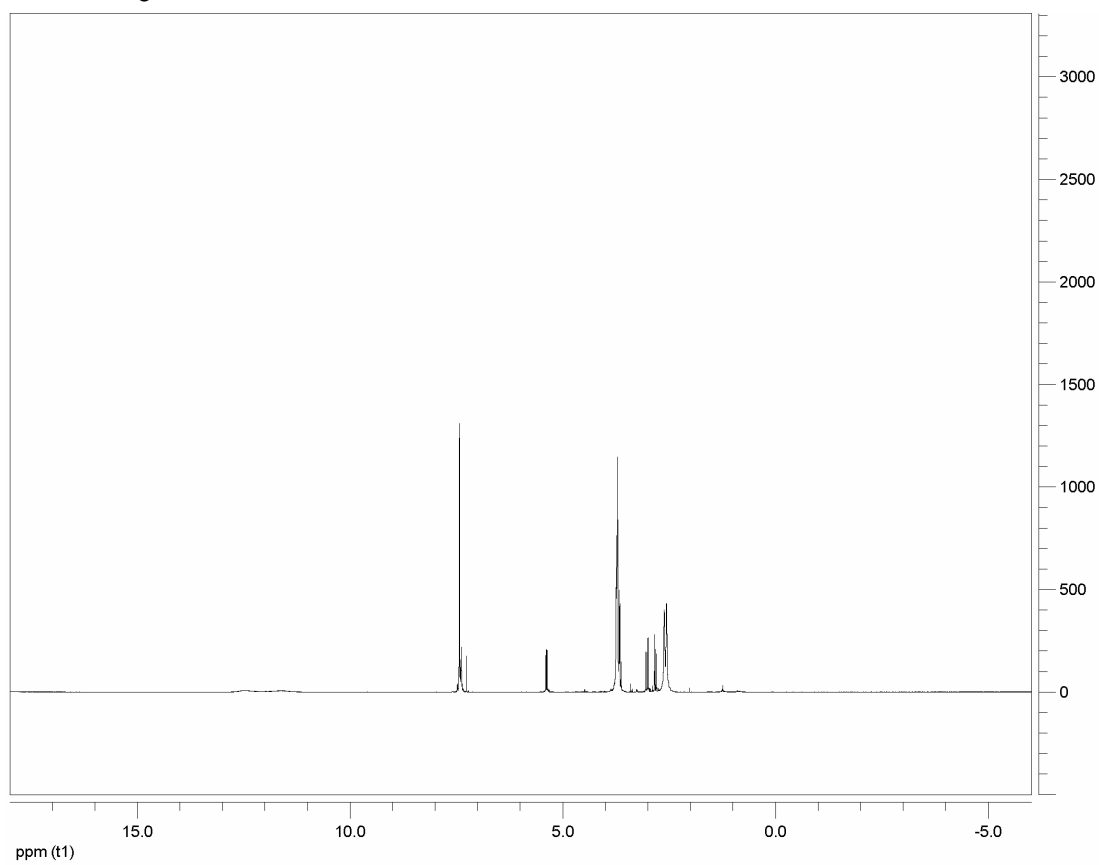



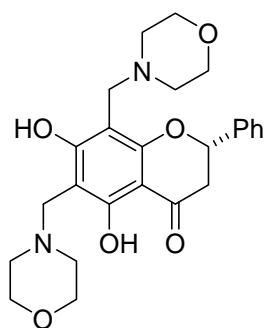**8**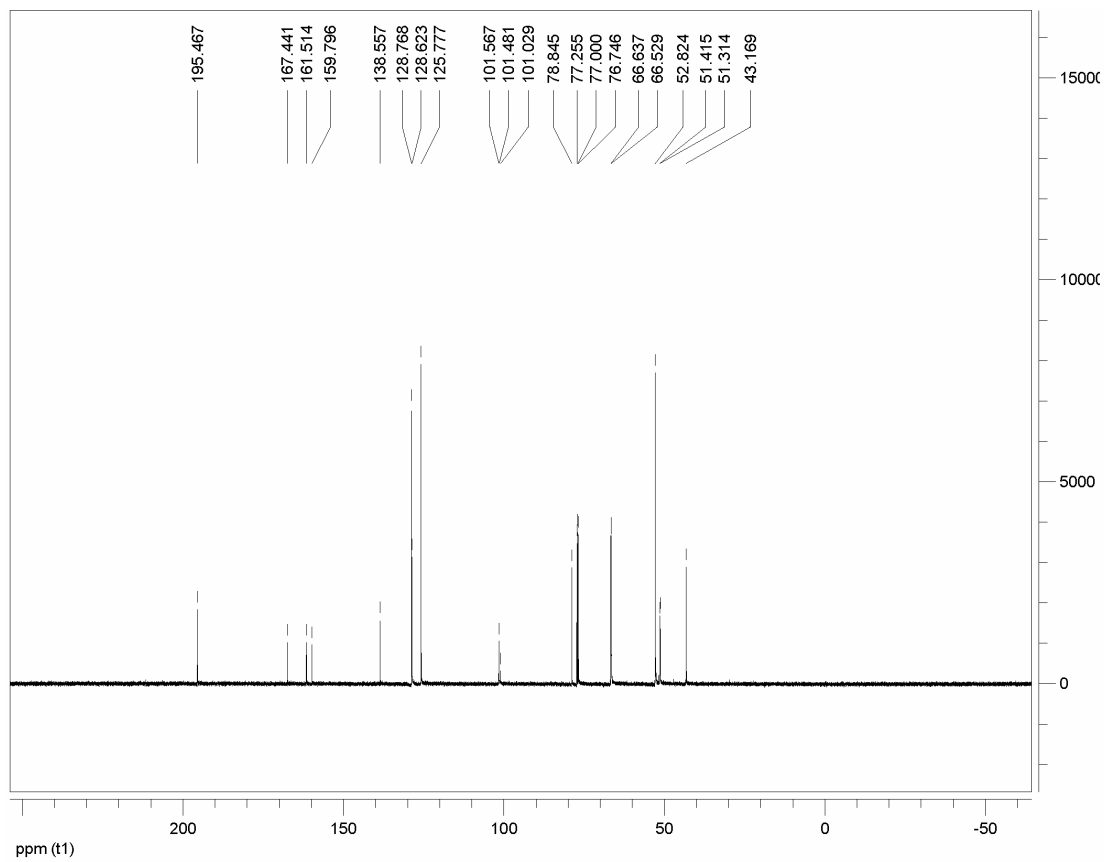

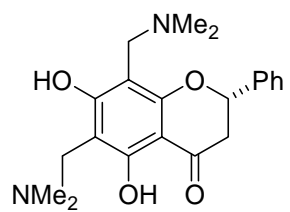**9**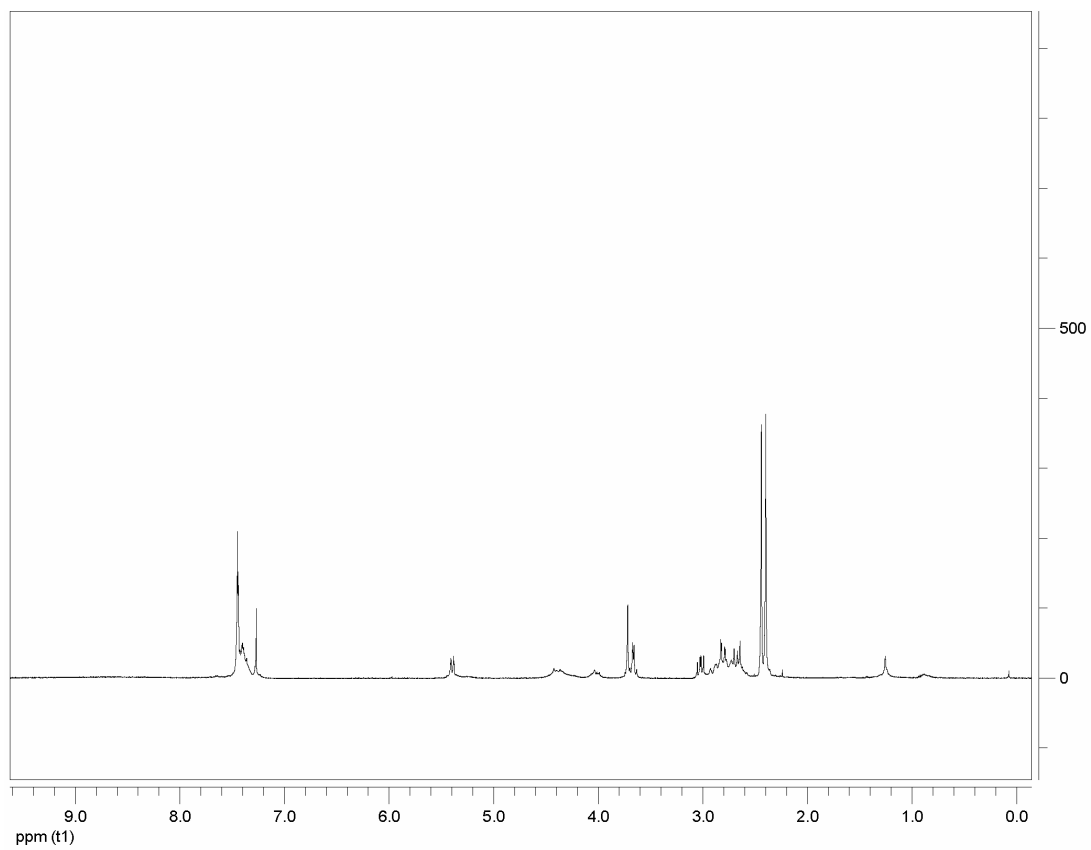

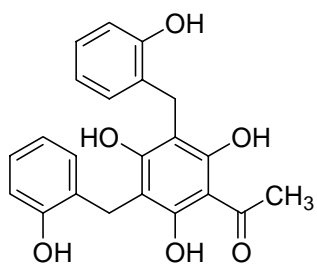

11

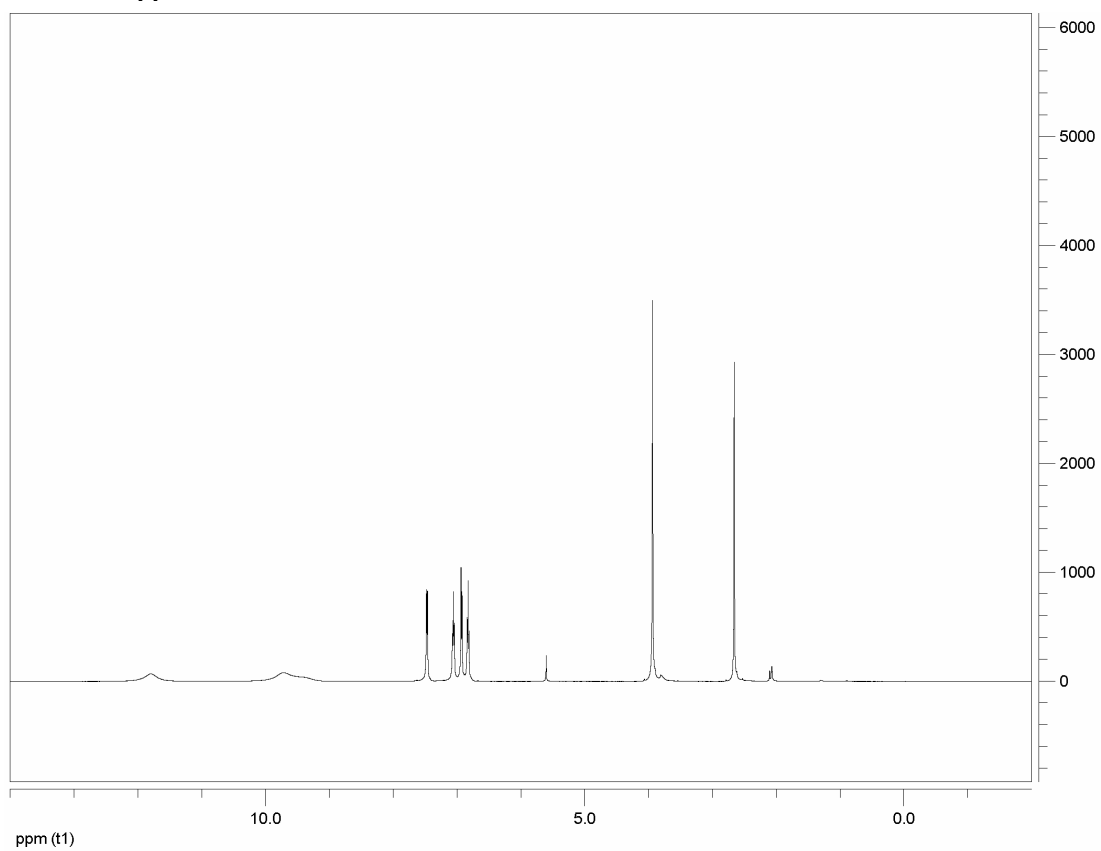

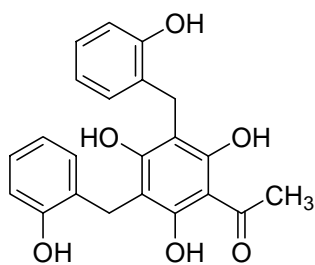

11

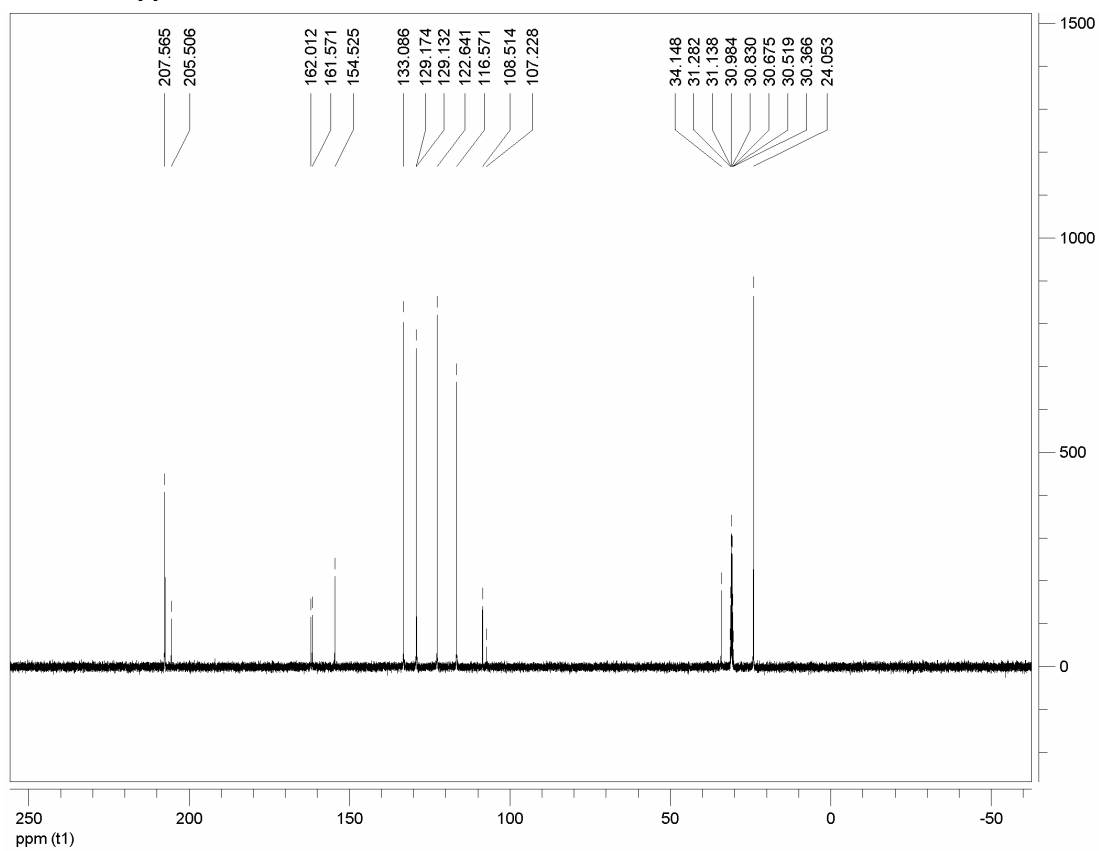

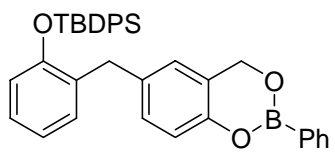**13**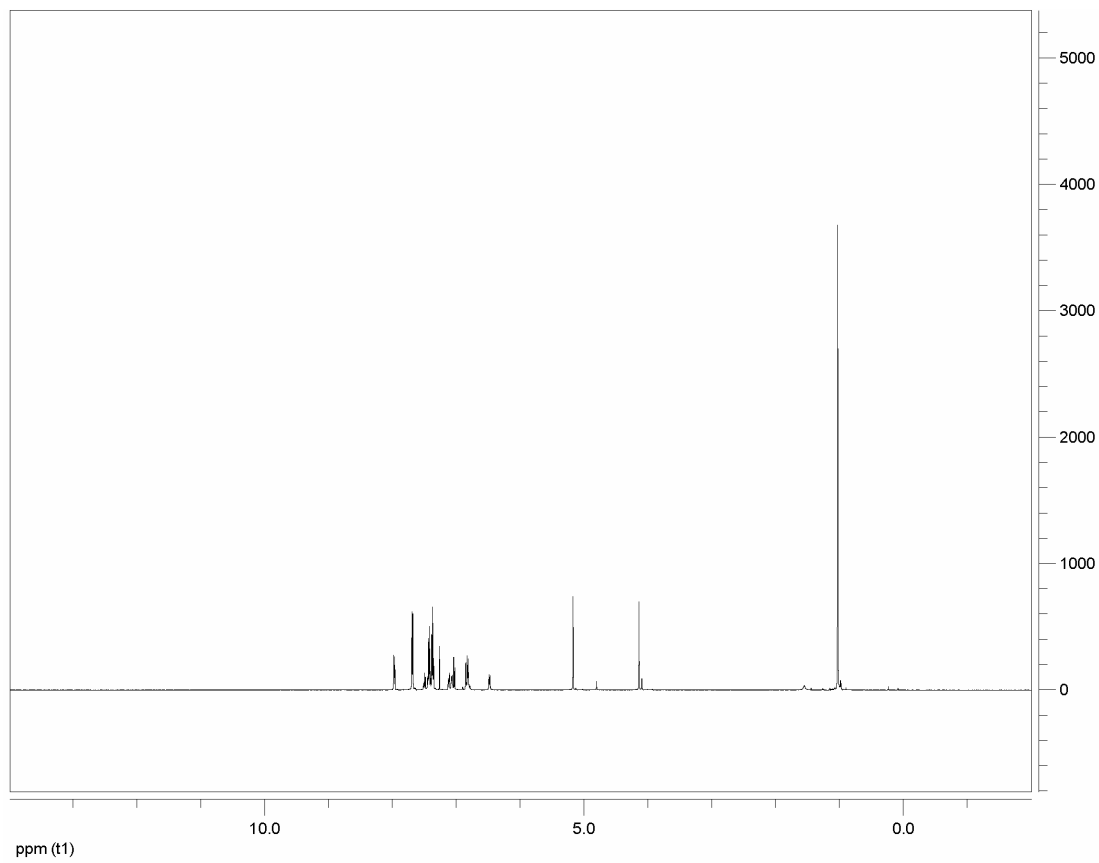

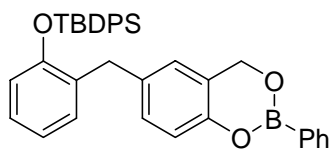

13

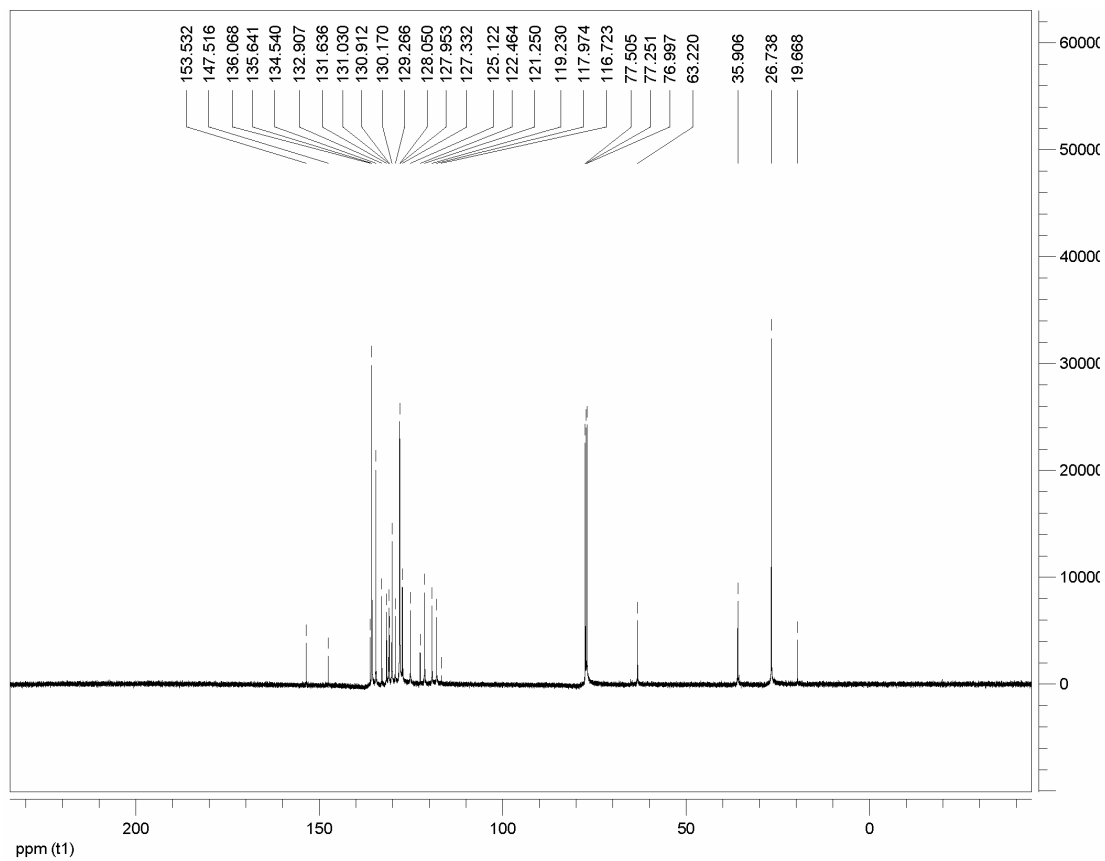

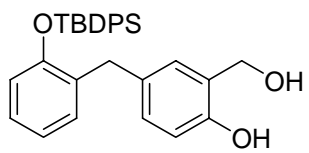

14

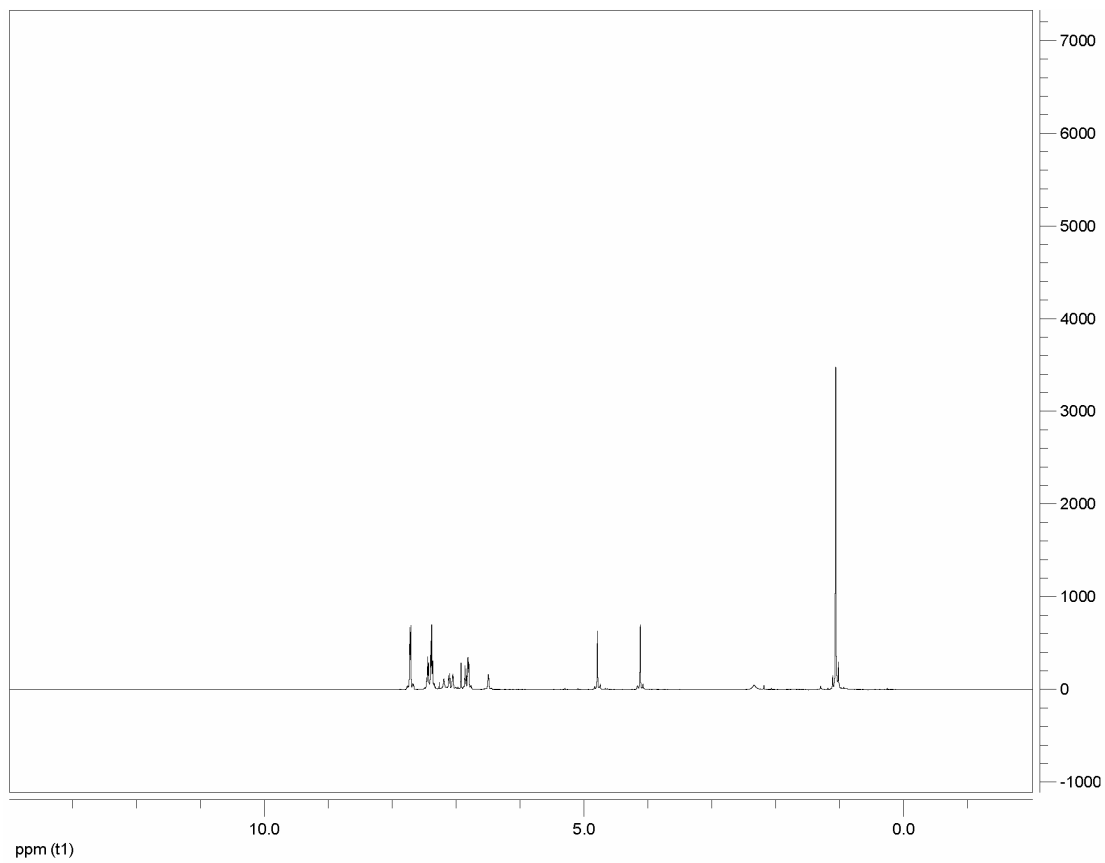

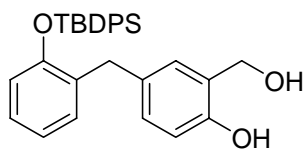**14**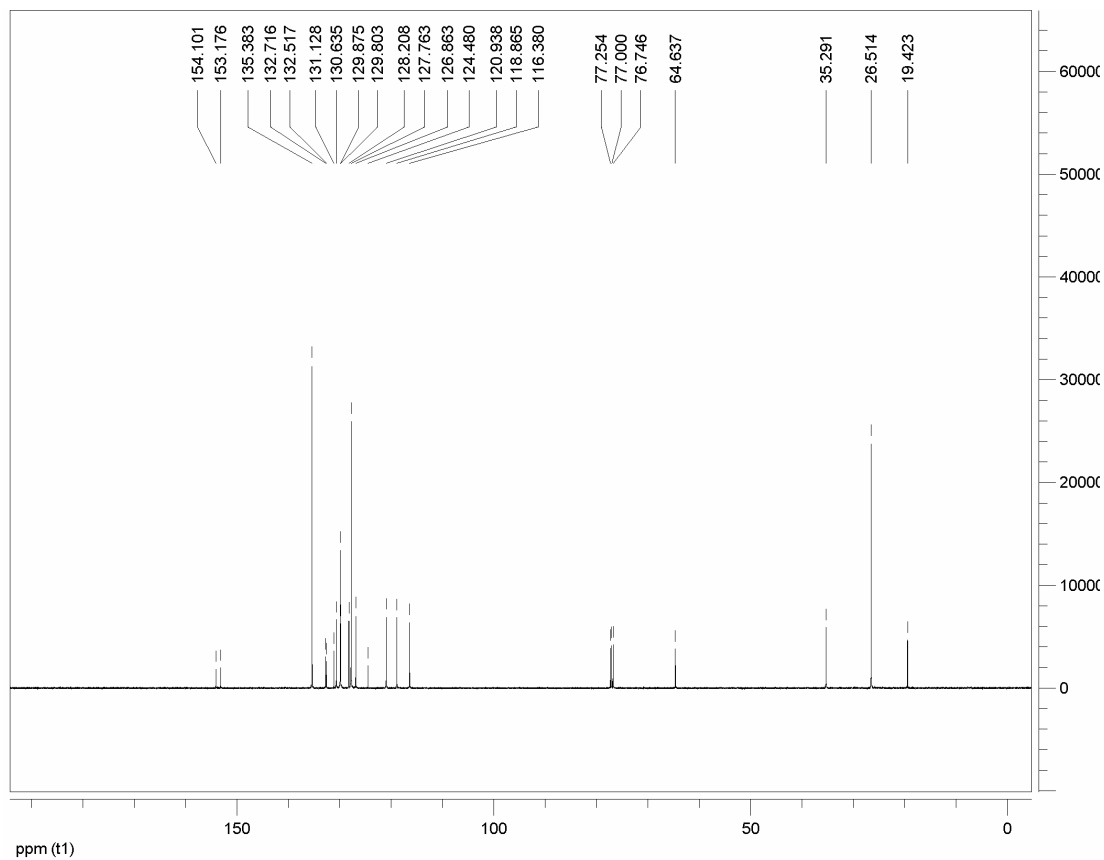



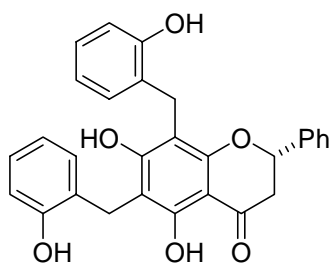**2**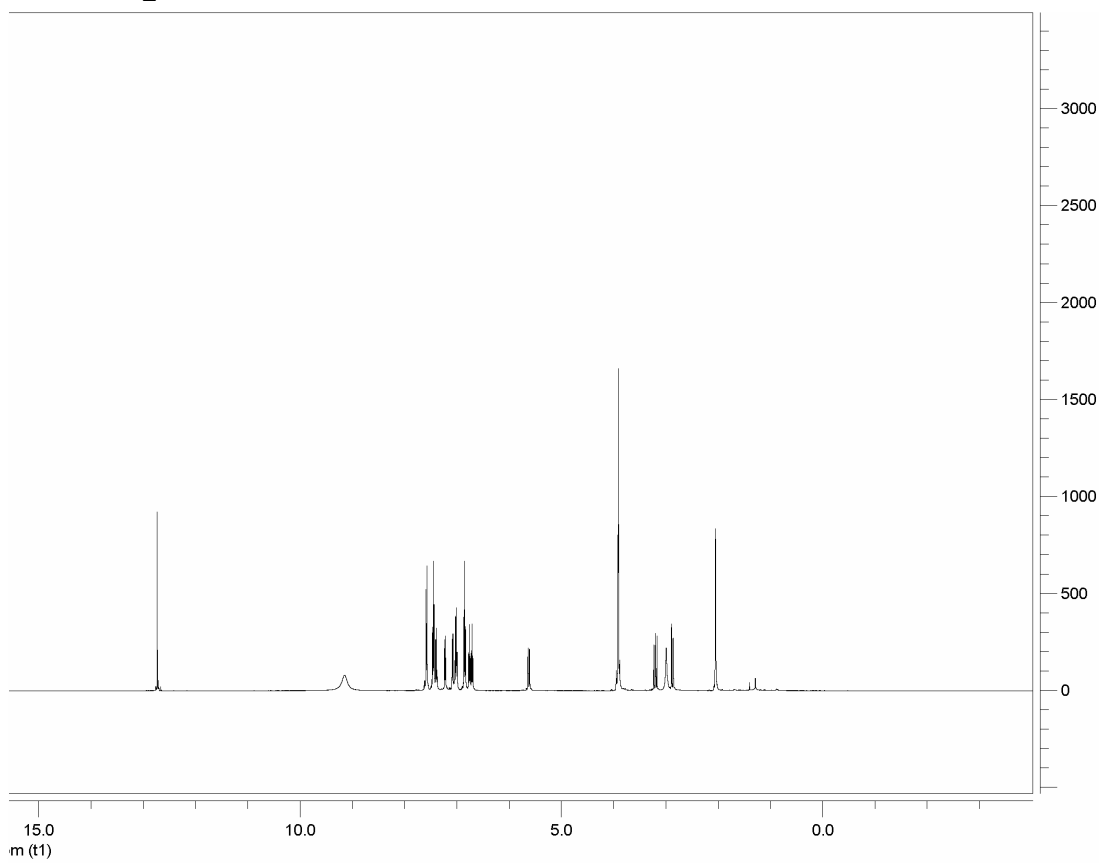

**2**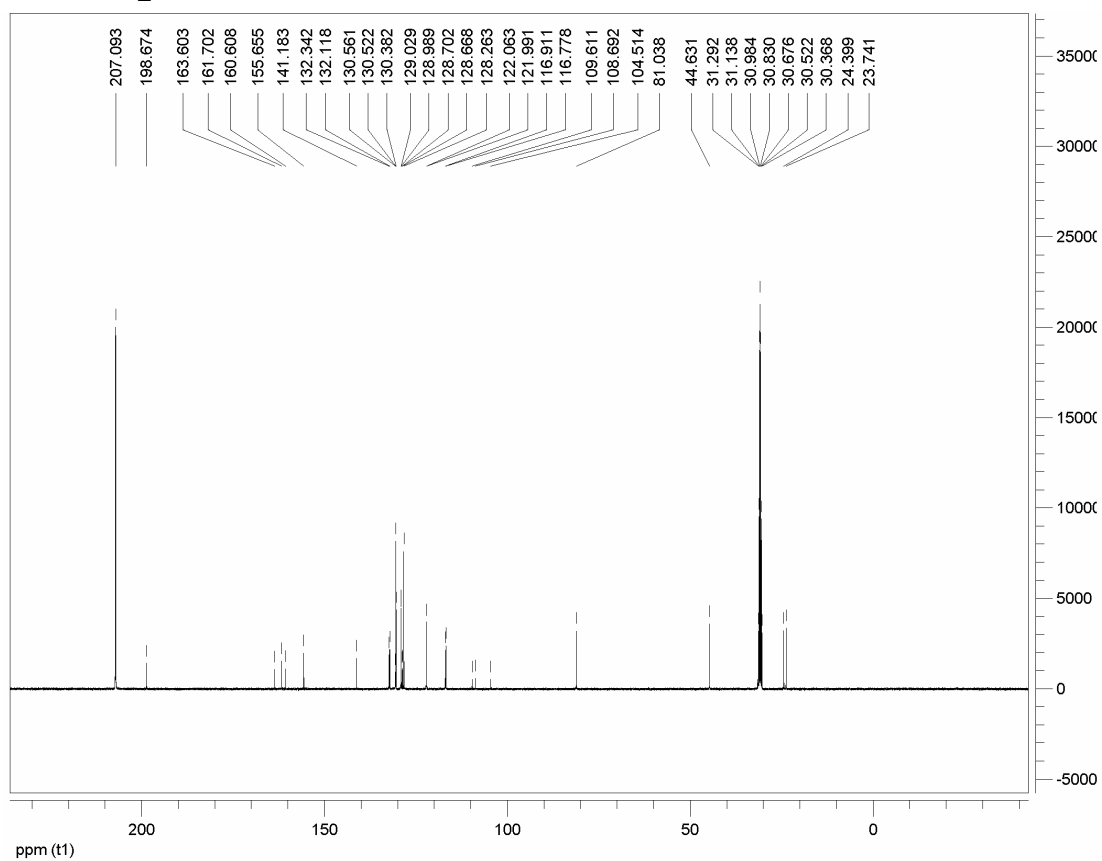



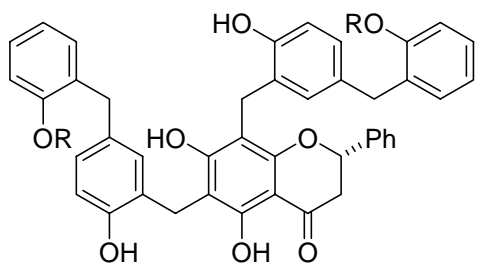**15** R = TBDPS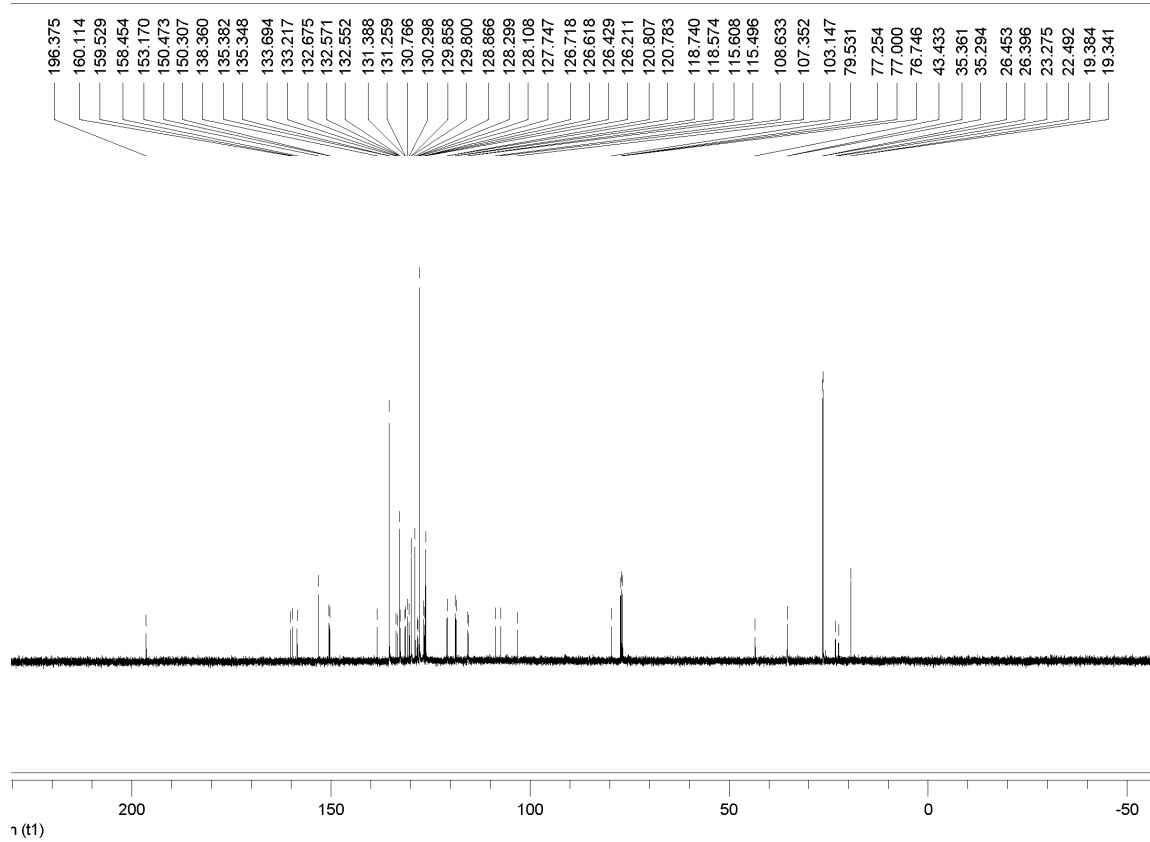

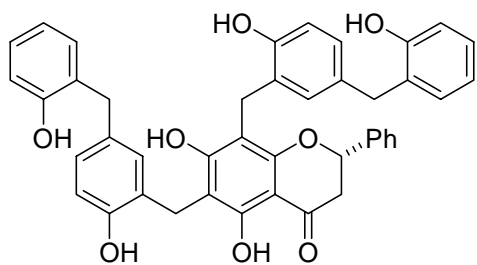**3**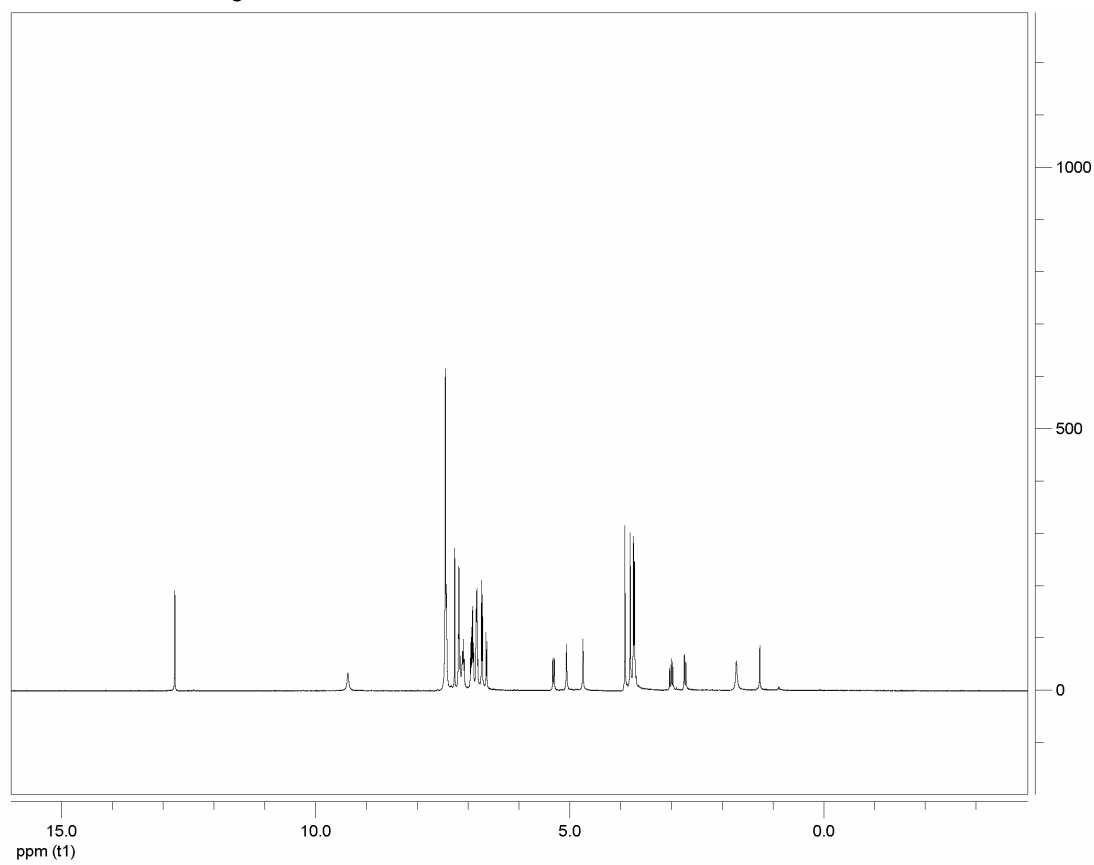

**3**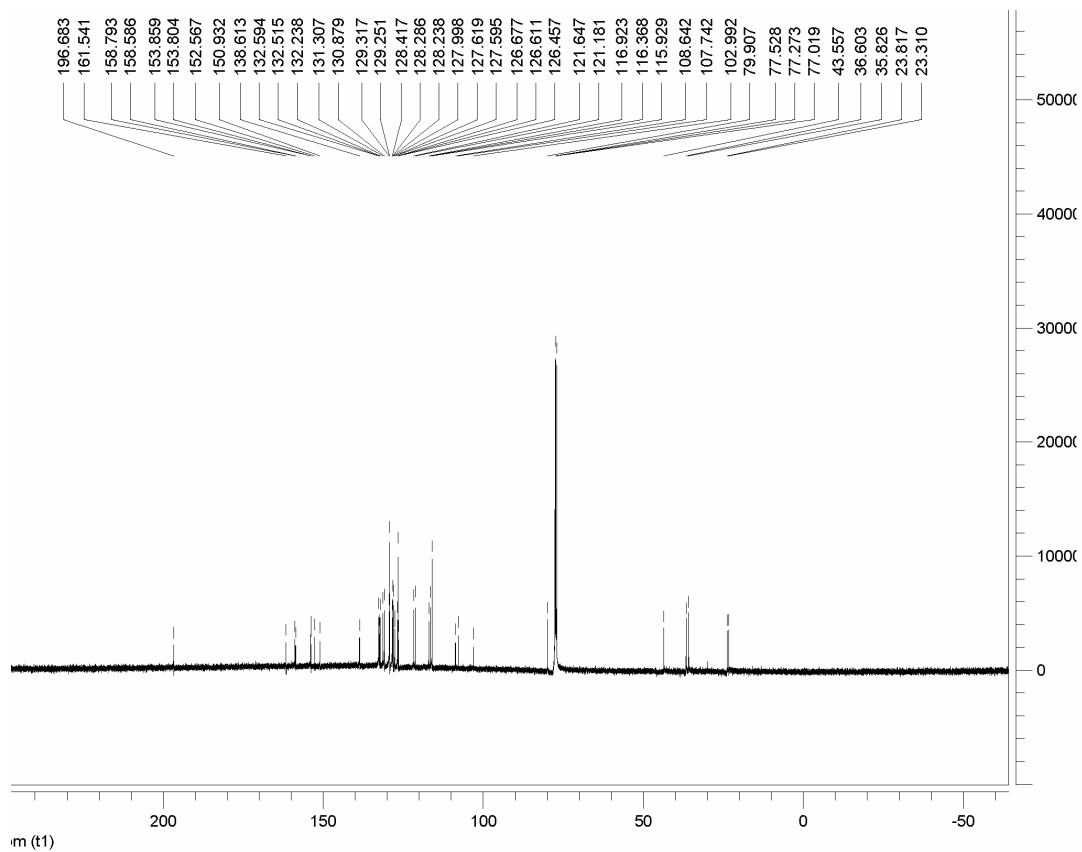

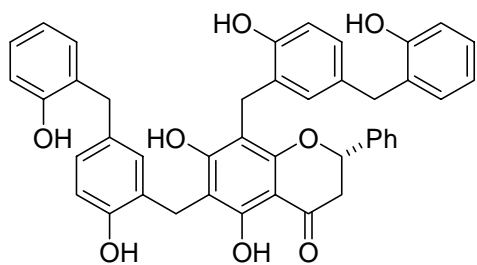**3**Added 2 drops of D<sub>2</sub>O, NMR taken after 1 day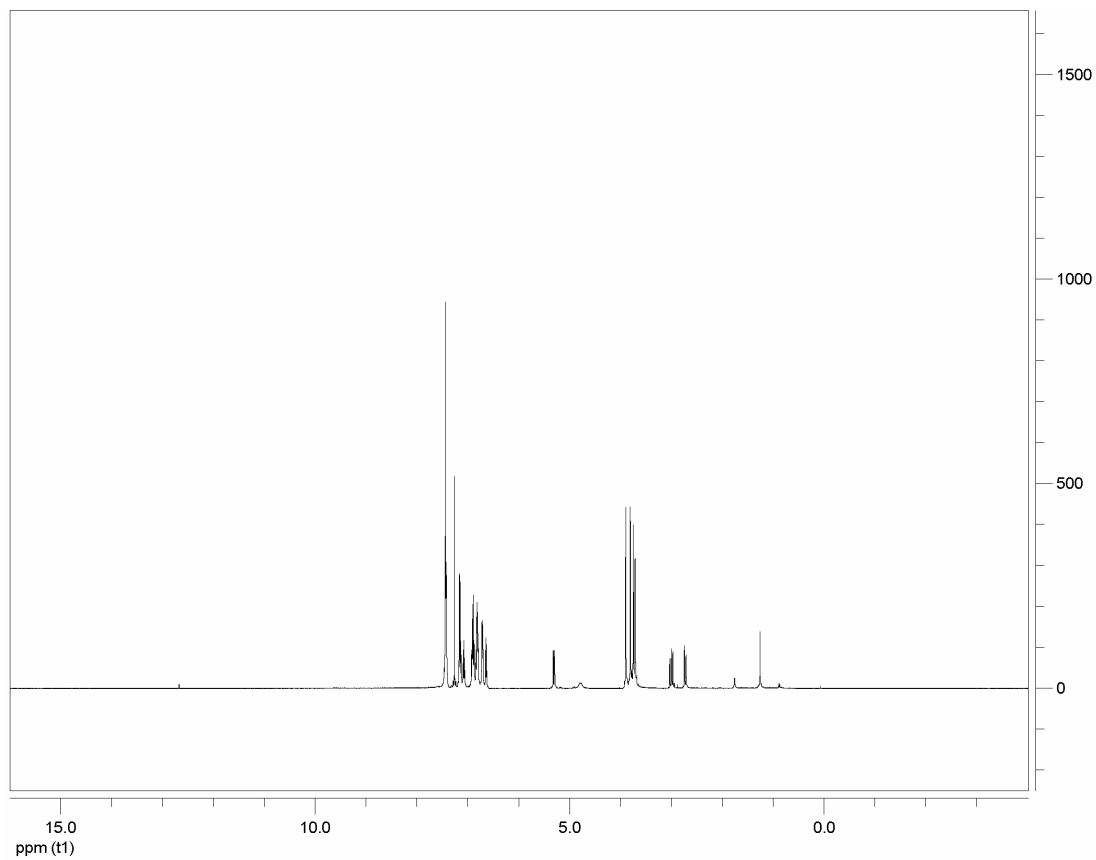

Supplement: NIHMS63019-supplement-1si20051024_09.pdf [file NIHMS63019-supplement-1si20051024_09.pdf]
